# Supplementary material
Source: MDPI journal article supplement (https://www.mdpi.com/1999-4907/10/12/1150)
Supplement: s1 [file s1]

# Supplementary material

**Table S1.** The plots general characteristics of Shaanxi province.

| Site | Species | Plot Number | Density of Trees<br>(trees·1000 m <sup>-2</sup> ) | Breast Diameter<br>(cm) | Tree Height<br>(m) |
|------|---------|-------------|---------------------------------------------------|-------------------------|--------------------|
| NSX  | QW      | 8           | 746 (150~900)                                     | 12.60 ± 0.50            | 13.80 ± 0.50       |
|      | RP      | 5           | 855 (166~1917)                                    | 12.80 ± 0.30            | 10.50 ± 0.30       |
| MSX  | QW      | 7           | 776 (233~1550)                                    | 13.50 ± 0.30            | 15.20 ± 0.30       |
|      | RP      | 7           | 1163 (550~1860)                                   | 13.20 ± 0.20            | 11.60 ± 0.10       |
| SSX  | QW      | 8           | 975 (300~2333)                                    | 12.90 ± 0.50            | 10.40 ± 0.20       |
|      | RP      | 4           | 1050 (617~1300)                                   | 13.10 ± 0.40            | 14.70 ± 0.30       |

Note: QW is *Q. wutaishanica* forest, RP is *R. pseudoacacia* forest; NSX: Northern Shaanxi Plateau, MSX: Guanzhong Plain, SSX: Southern Shaanxi Mountain.

**Table S2.** Allometric growth equation for two tree species.

|       | QW[1]                | RP[2]                  |
|-------|----------------------|------------------------|
| $W_S$ | $0.0974DBH^{2.1176}$ | $0.18DBH^{2.1318}$     |
| $W_B$ | $0.014DBH^{3.095}$   | $0.03743DBH^{2.2434}$  |
| $W_L$ | $0.017DBH^{2.321}$   | $0.008883DBH^{2.3462}$ |
| $W_R$ | $0.0265DBH^{2.3865}$ | $0.0178DBH^{2.645}$    |
| $W_T$ | $W_S+W_B+W_L+W_R$    |                        |

Note:  $W_S$ ,  $W_B$ ,  $W_L$ ,  $W_R$  and  $W_T$  were the total biomass (kg) of trunk, branch, leaf, root and tree, respectively. DBH: Diameter at breast height of tree.

## References

1. Zhang, B.L. Study on biomass and productivity of *Quercus lidotungensis* stands in Ziwuling forest region of Shaanxi province. *Journal of Northwest Forestry University* **1990**, 1, 1–7, (In Chinese).
2. Zhang, B.L. Biomass and production of *Robinia pseudoacacia* plantation in hongxing tree farm of Changwu county, Shaanxi province. *Shaanxi Forest Science & Technology* **1992**, 3, 13–17, (In Chinese).
